# Supplementary material for: Memory T Cells Expressing an NKG2D-CAR Efficiently Target Osteosarcoma Cells
Source: Oxford University Press journal article supplement (doi:10.1158/1078-0432.ccr-17-0075), 2017-06-28
Supplement: 10780432ccr170075-sup-177199_3_supp_4111604_crc44y.xls [file 10780432ccr170075-sup-177199_3_supp_4111604_crc44y.xls]

## Sheet: Hoja1
Subpopulations	CD3+	CD4+	Naïve CD4+	Effector CD4+	Central Memory CD4+	Effector Memory CD4+	CD8+	Naïve CD8+	Effector CD8+	Central Memory CD8+	Effector Memory CD8+	TCR g/d
CD45RA-	98.41	78.4	0.08	1.43	12.53	86.00	14.48	0.14	1.85	6.46	91.55	4.96
CD45RA+	52.90	10.63	19.73	27.63	19.27	33.40	17.63	16.36	35.00	6.26	42.37	26.77
